# Supplementary material for: Cell-Specific Cardiac Electrophysiology Models
Source: PubMed Central journal article supplement (PMC4415772; doi:10.1371/journal.pcbi.1004242), 2015-04-30

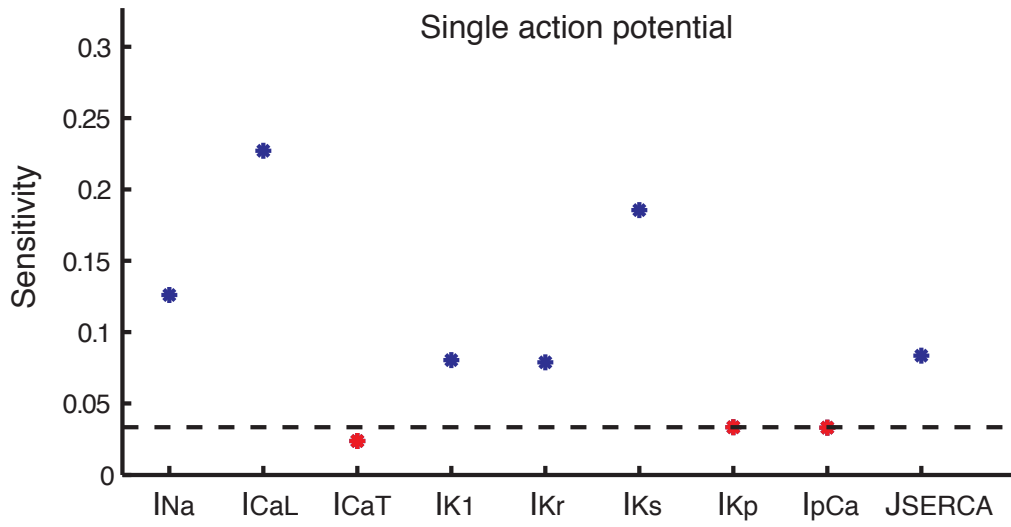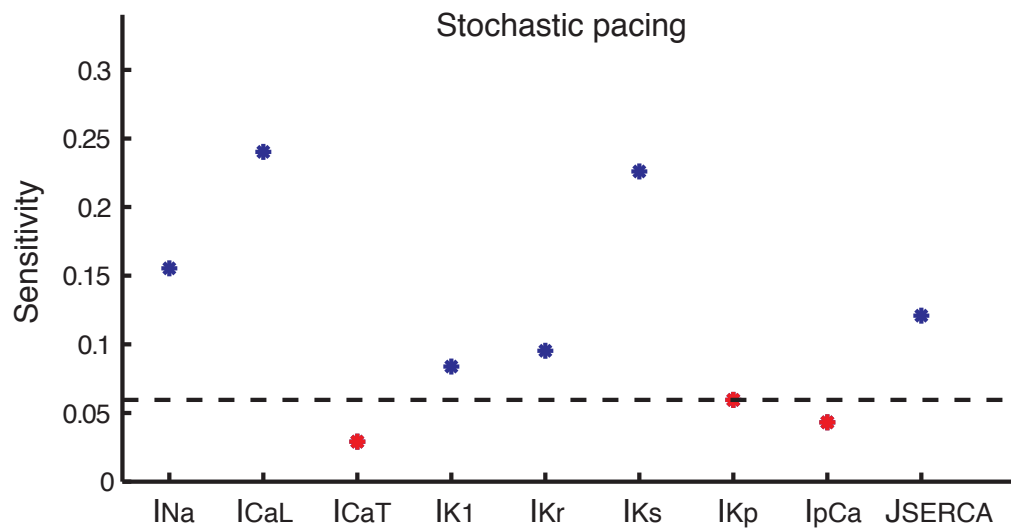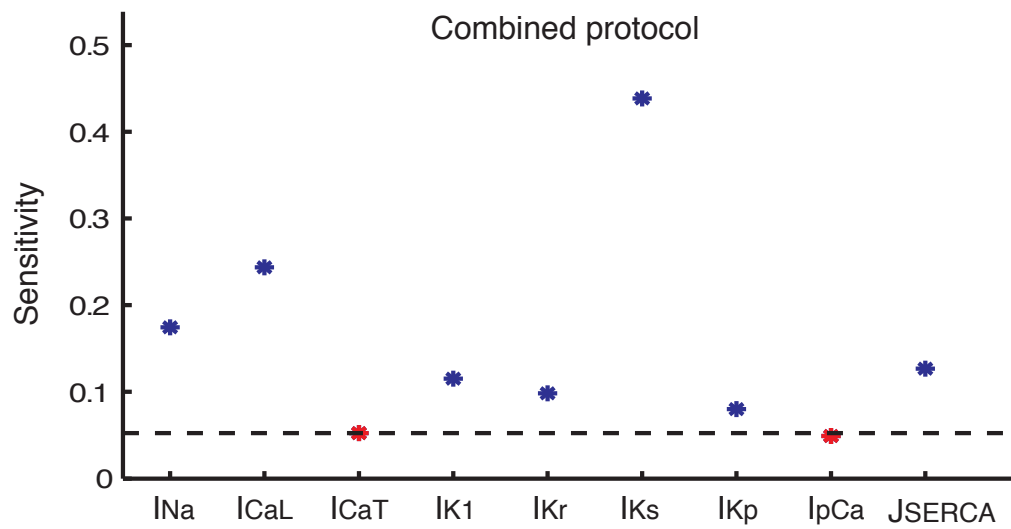

Supplement: pcbi.1004242.s003.pdf [file pcbi.1004242.s003.pdf]
